# Supplementary material for: Fused Pyrroles in Cholestane and Norcholestane Side Chains: Acaricidal and Plant Growth-Promoting Effects
Source: MDPI journal article supplement (doi:10.3390/molecules27238466), 2022-12-02
Supplement: s1 [file s1]

*Table of Content*

|                                                                                           |     |
|-------------------------------------------------------------------------------------------|-----|
| 1. <b>Figure S1.</b> $^1\text{H}$ NMR $\text{CDCl}_3$ , 600 MHz compound <b>3a</b> .      | S3  |
| 2. <b>Figure S2.</b> $^{13}\text{C}$ NMR $\text{CDCl}_3$ , 150 MHz compound <b>3a</b> .   | S3  |
| 3. <b>Figure S3.</b> COSY experiment compound <b>3a</b> .                                 | S4  |
| 4. <b>Figure S4.</b> HSQC experiment compound <b>3a</b> .                                 | S4  |
| 5. <b>Figure S5.</b> HMBC experiment compound <b>3a</b> .                                 | S5  |
| 6. <b>Figure S5.</b> $^1\text{H}$ NMR $\text{CDCl}_3$ , 600 MHz compound <b>3b</b> .      | S5  |
| 7. <b>Figure S7.</b> $^{13}\text{C}$ NMR $\text{CDCl}_3$ , 150 MHz compound <b>3b</b> .   | S6  |
| 8. <b>Figure S8.</b> COSY experiment compound <b>3b</b> .                                 | S6  |
| 9. <b>Figure S9.</b> HSQC experiment compound <b>3b</b> .                                 | S7  |
| 10. <b>Figure S10.</b> HMBC experiment compound <b>3b</b> .                               | S7  |
| 11. <b>Figure S11.</b> $^1\text{H}$ NMR $\text{CDCl}_3$ , 600 MHz compound <b>3c</b> .    | S8  |
| 12. <b>Figure S12.</b> $^{13}\text{C}$ NMR $\text{CDCl}_3$ , 150 MHz compound <b>3c</b> . | S8  |
| 13. <b>Figure S13.</b> COSY experiment compound <b>3c</b> .                               | S9  |
| 14. <b>Figure S14.</b> HSQC experiment compound <b>3c</b> .                               | S9  |
| 15. <b>Figure S15.</b> HMBC experiment compound <b>3c</b> .                               | S10 |
| 16. <b>Figure S16.</b> $^1\text{H}$ NMR $\text{CDCl}_3$ , 600 MHz compound <b>7</b> .     | S10 |
| 17. <b>Figure S17.</b> $^{13}\text{C}$ NMR $\text{CDCl}_3$ , 150 MHz compound <b>7</b> .  | S11 |
| 18. <b>Figure S18.</b> COSY experiment compound <b>7</b> .                                | S11 |
| 19. <b>Figure S19.</b> HSQC experiment compound <b>7</b> .                                | S12 |
| 20. <b>Figure S20.</b> HMBC experiment compound <b>7</b> .                                | S12 |
| 21. <b>Figure S21.</b> $^1\text{H}$ NMR $\text{CDCl}_3$ , 600 MHz compound <b>8a</b> .    | S13 |
| 22. <b>Figure S22.</b> $^{13}\text{C}$ NMR $\text{CDCl}_3$ , 150 MHz compound <b>8a</b> . | S13 |
| 23. <b>Figure S23.</b> COSY experiment compound <b>8a</b> .                               | S14 |
| 24. <b>Figure S24.</b> HSQC experiment compound <b>8a</b> .                               | S14 |
| 25. <b>Figure S25.</b> HMBC experiment compound <b>8a</b> .                               | S15 |
| 26. <b>Figure S26.</b> $^1\text{H}$ NMR $\text{CDCl}_3$ , 600 MHz compound <b>8b</b> .    | S15 |
| 27. <b>Figure S27.</b> $^{13}\text{C}$ NMR $\text{CDCl}_3$ , 150 MHz compound <b>8b</b> . | S16 |
| 28. <b>Figure S28.</b> COSY experiment compound <b>8b</b> .                               | S16 |
| 29. <b>Figure S29.</b> HSQC experiment compound <b>8b</b> .                               | S17 |
| 30. <b>Figure S30.</b> HMBC experiment compound <b>8b</b> .                               | S17 |
| 31. <b>Figure S31.</b> $^1\text{H}$ NMR $\text{CDCl}_3$ , 600 MHz compound <b>8c</b> .    | S18 |
| 32. <b>Figure S32.</b> $^{13}\text{C}$ NMR $\text{CDCl}_3$ , 150 MHz compound <b>8c</b> . | S18 |
| 33. <b>Figure S33.</b> COSY experiment compound <b>8c</b> .                               | S19 |
| 34. <b>Figure S34.</b> HSQC experiment compound <b>8c</b> .                               | S19 |
| 35. <b>Figure S35.</b> HMBC experiment compound <b>8c</b> .                               | S20 |

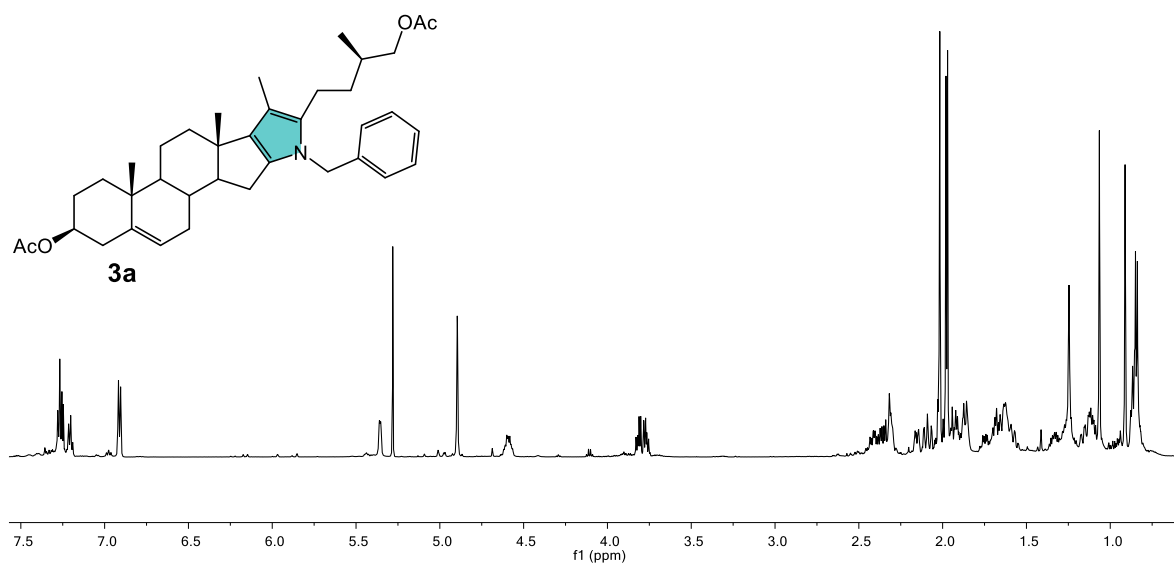

**Figure S1.**  $^1\text{H}$  NMR  $\text{CDCl}_3$ , 600 MHz compound **3a**.

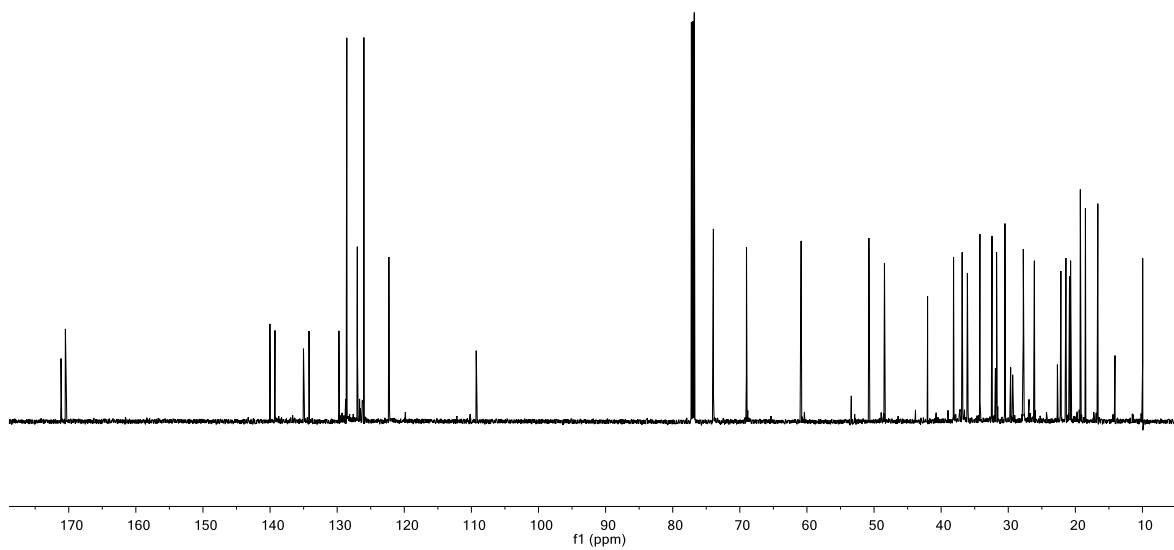

**Figure S2.**  $^{13}\text{C}$  NMR  $\text{CDCl}_3$ , 150 MHz compound **3a**.

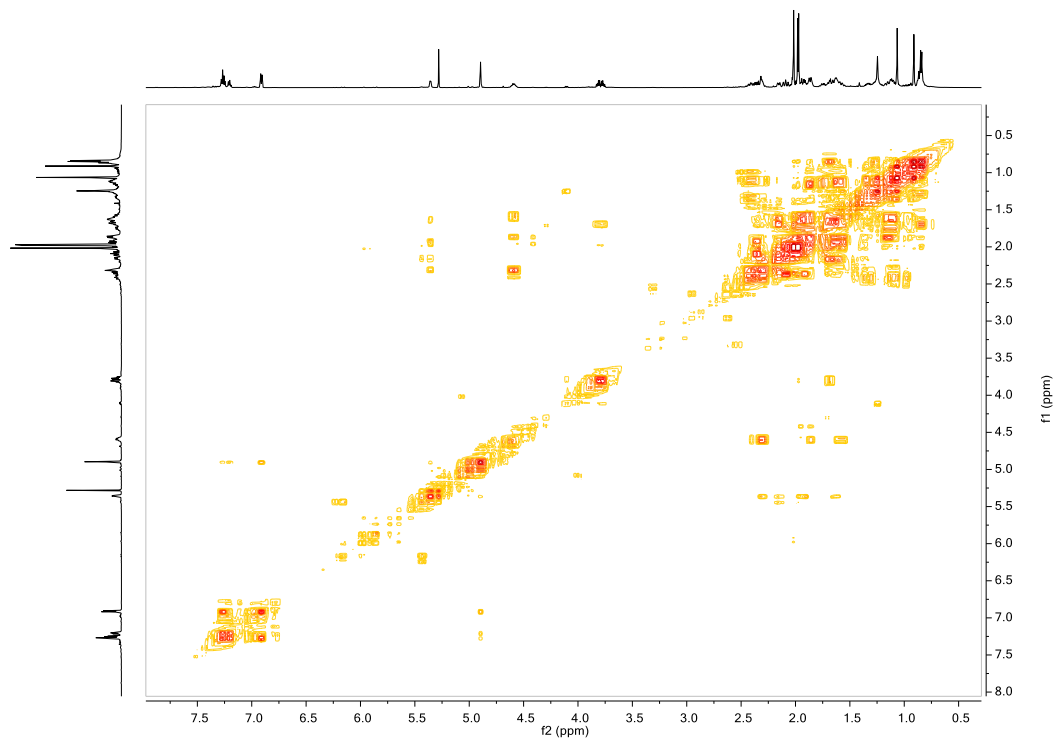

**Figure S3.** COSY experiment compound **3a**.

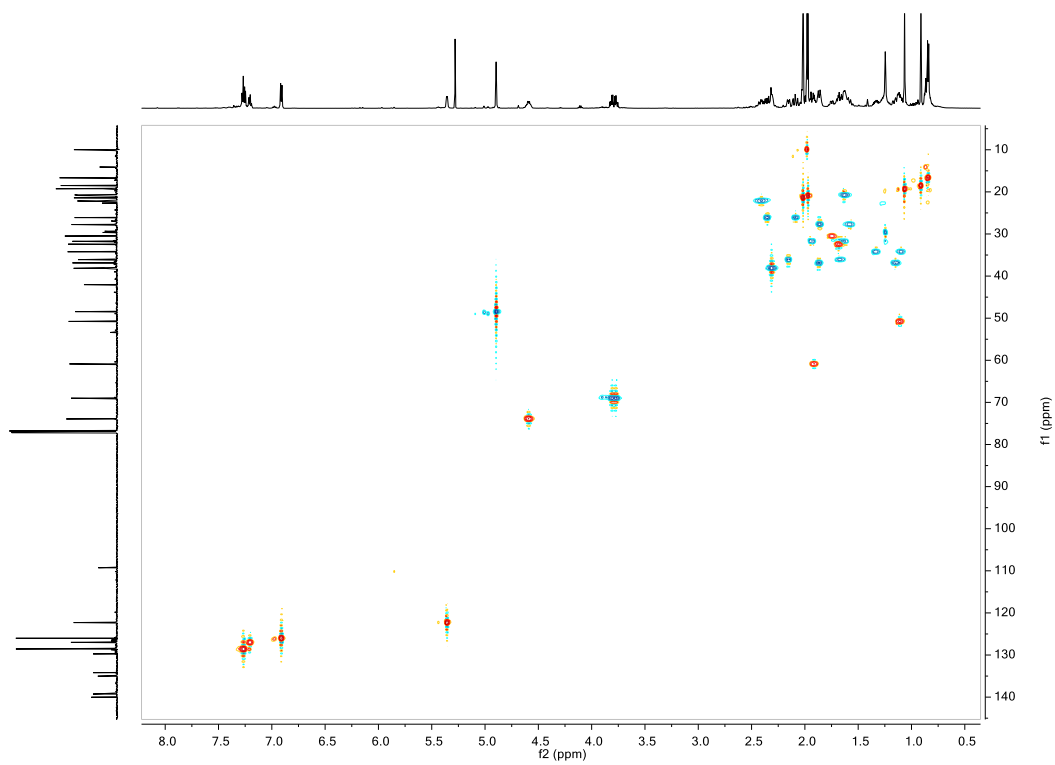

**Figure S4.** HSQC experiment compound **3a**.

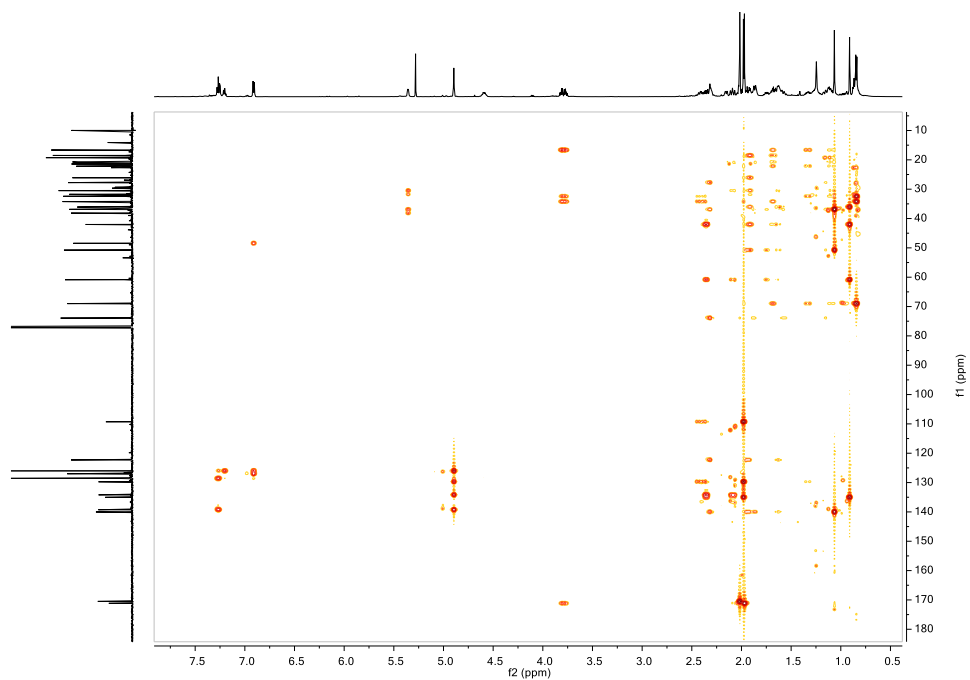

**Figure S5.** HMBC experiment compound **3a**.

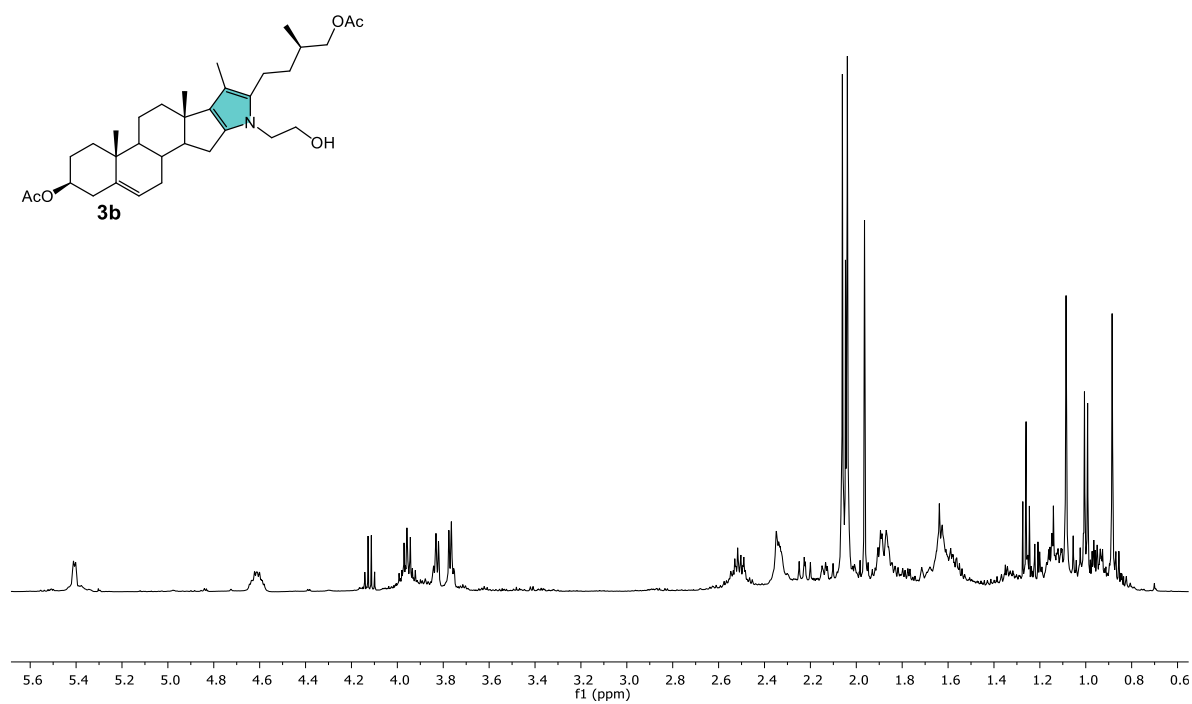

**Figure S6.**  $^1\text{H}$  NMR  $\text{CDCl}_3$ , 600 MHz compound **3b**.

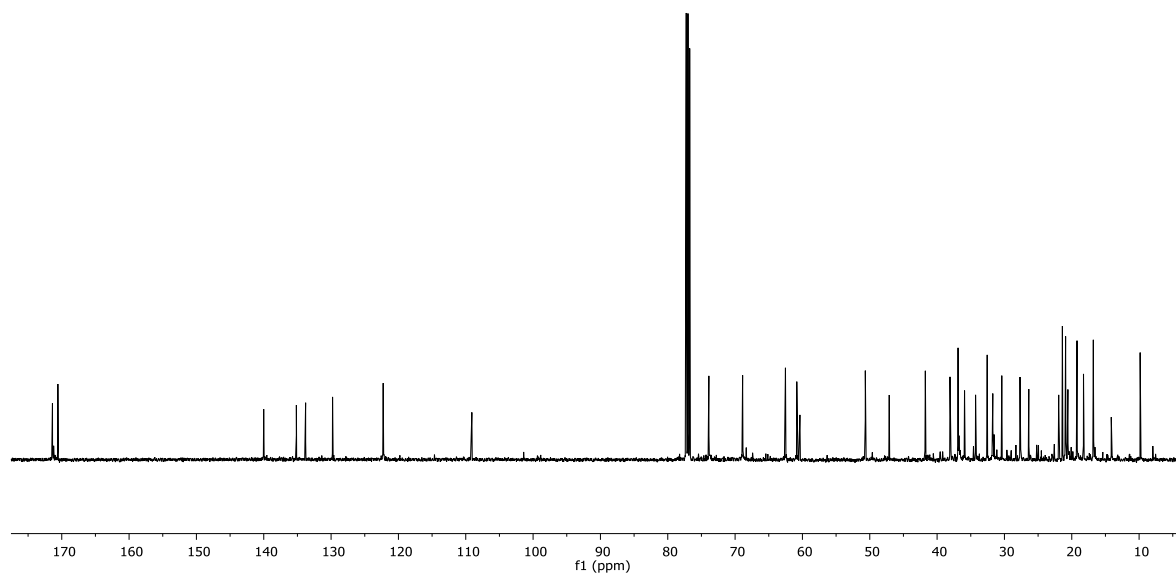

**Figure S7.**  $^{13}\text{C}$  NMR  $\text{CDCl}_3$ , 150 MHz compound **3b**.

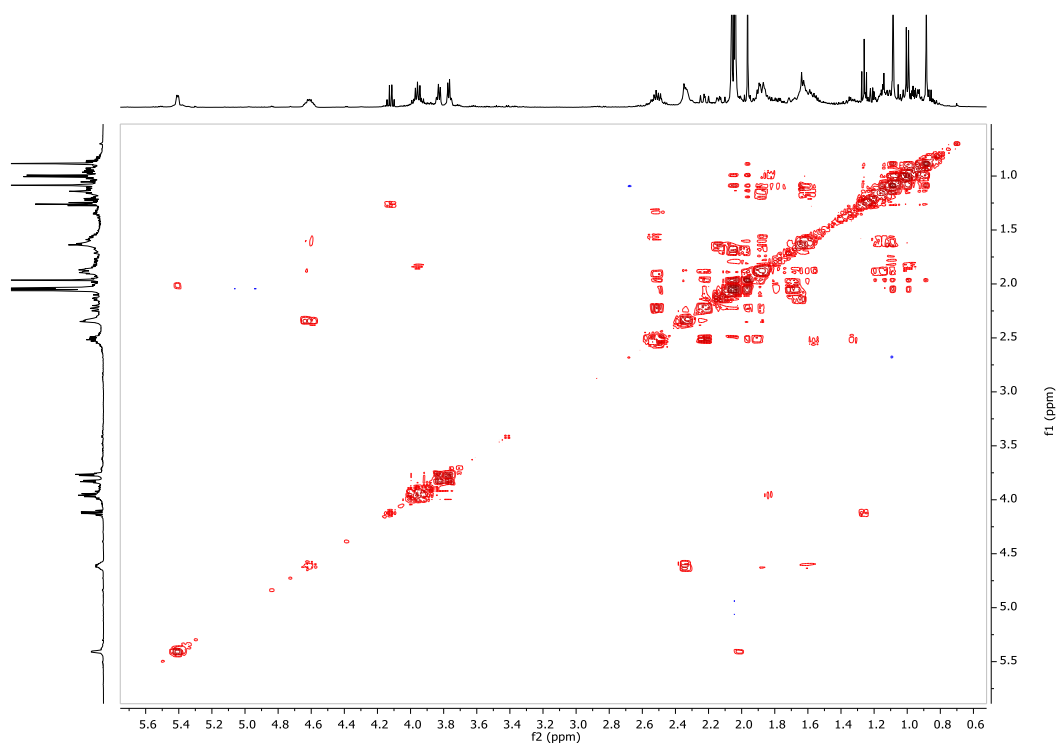

**Figure S8.** COSY experiment compound **3b**.

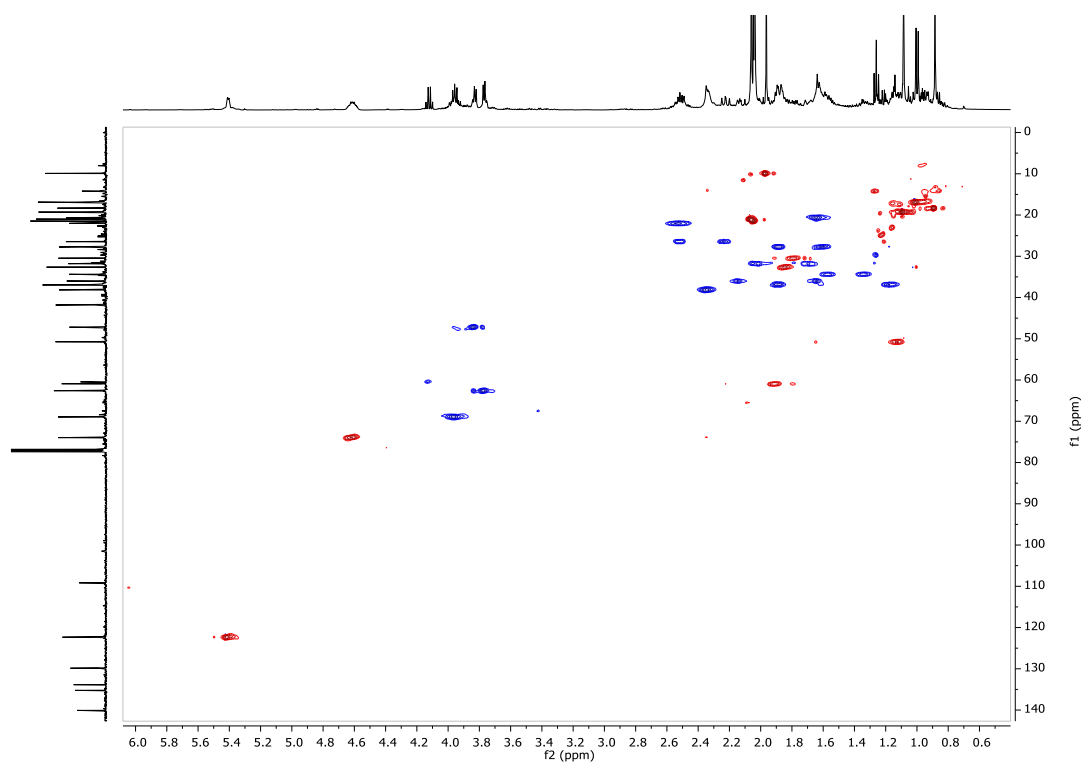

**Figure S9.** HSQC experiment compound **3b**.

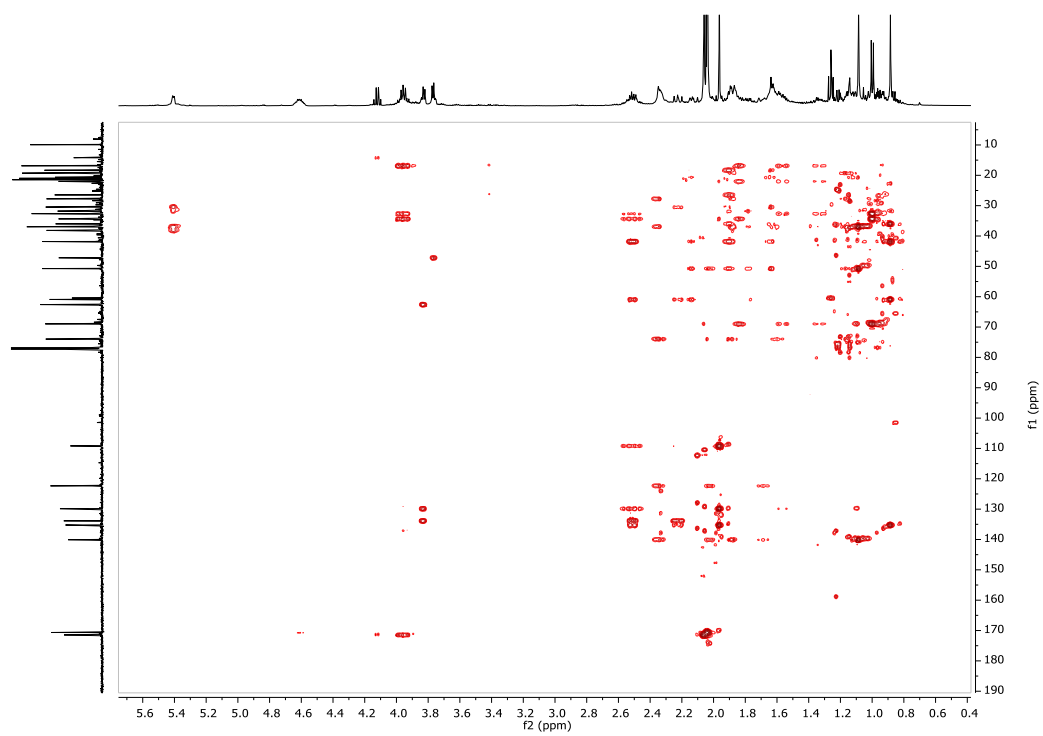

**Figure S10.** HMBC experiment compound **3b**.

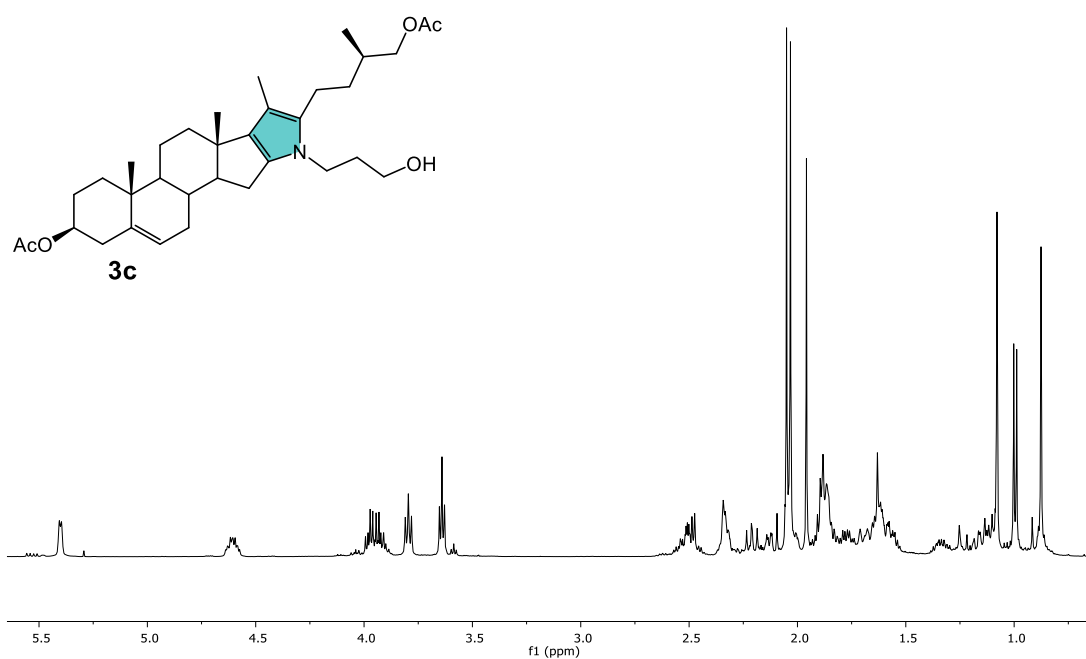

**Figure S11.**  $^1\text{H}$  NMR  $\text{CDCl}_3$ , 600 MHz compound **3c**.

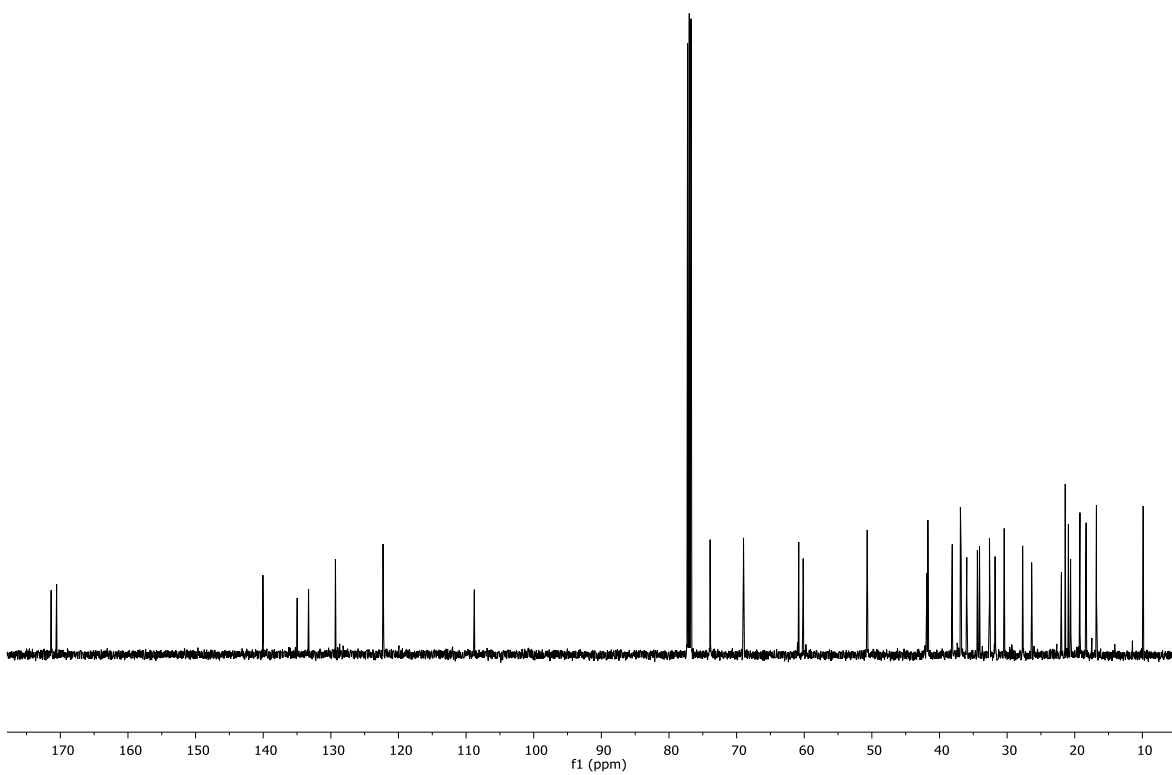

**Figure S12.**  $^{13}\text{C}$  NMR  $\text{CDCl}_3$ , 150 MHz compound **3c**.

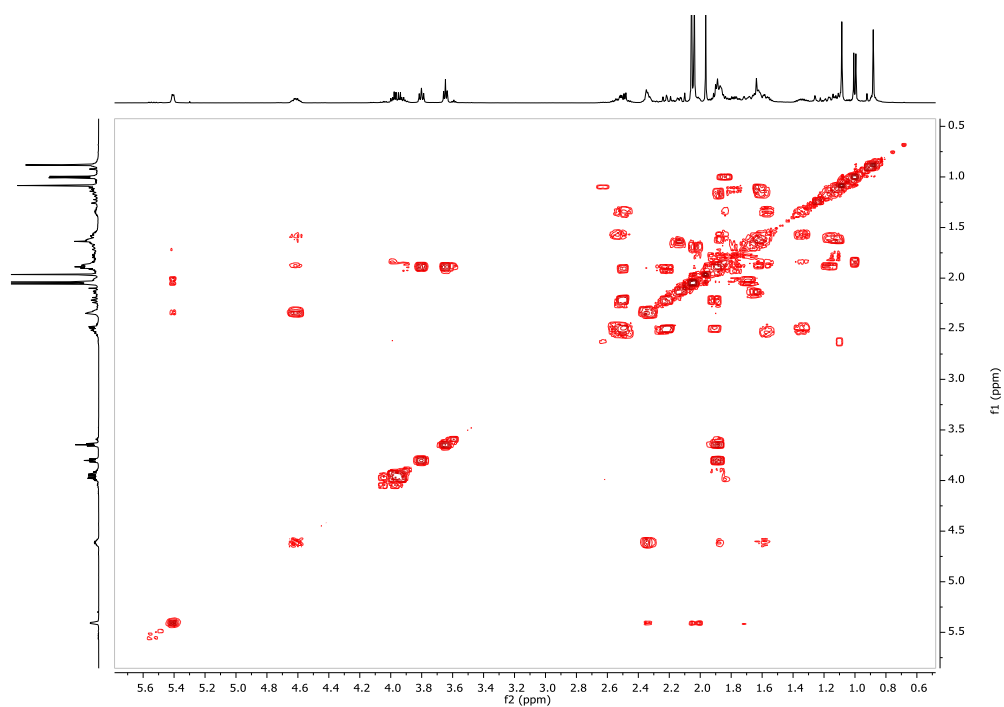

**Figure S13.** COSY experiment compound **3c**.

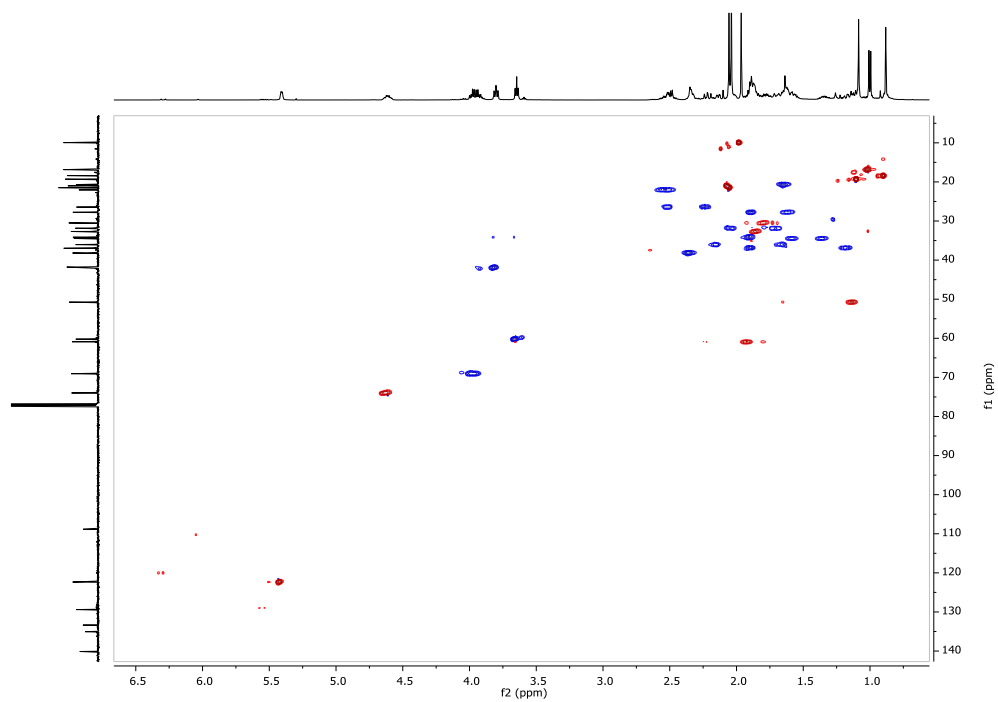

**Figure S14.** HSQC experiment compound **3c**.



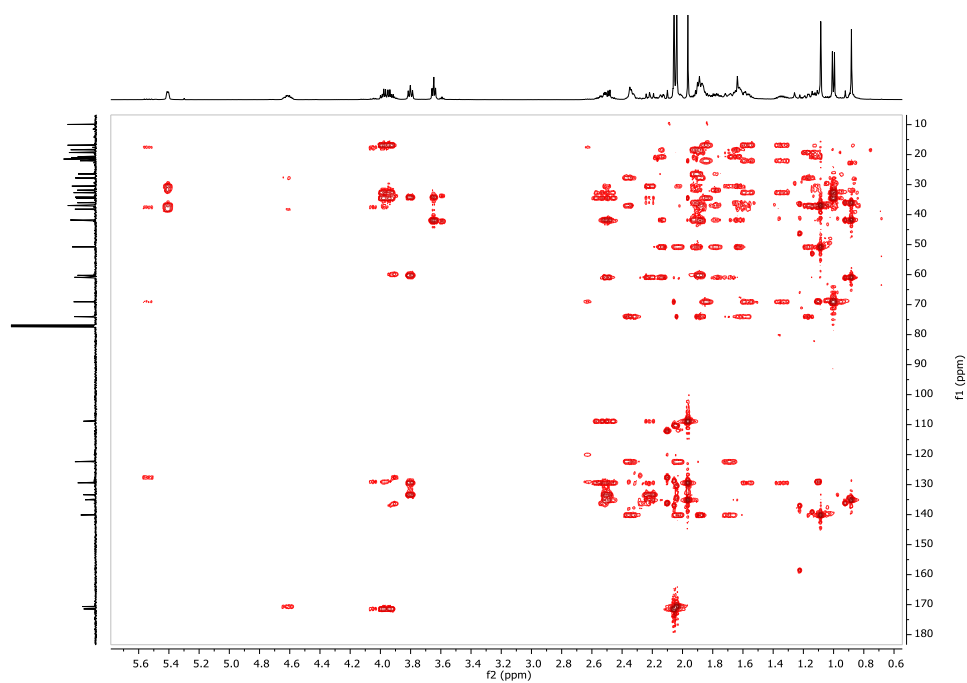

**Figure S15.** HMBC experiment compound **3c**.

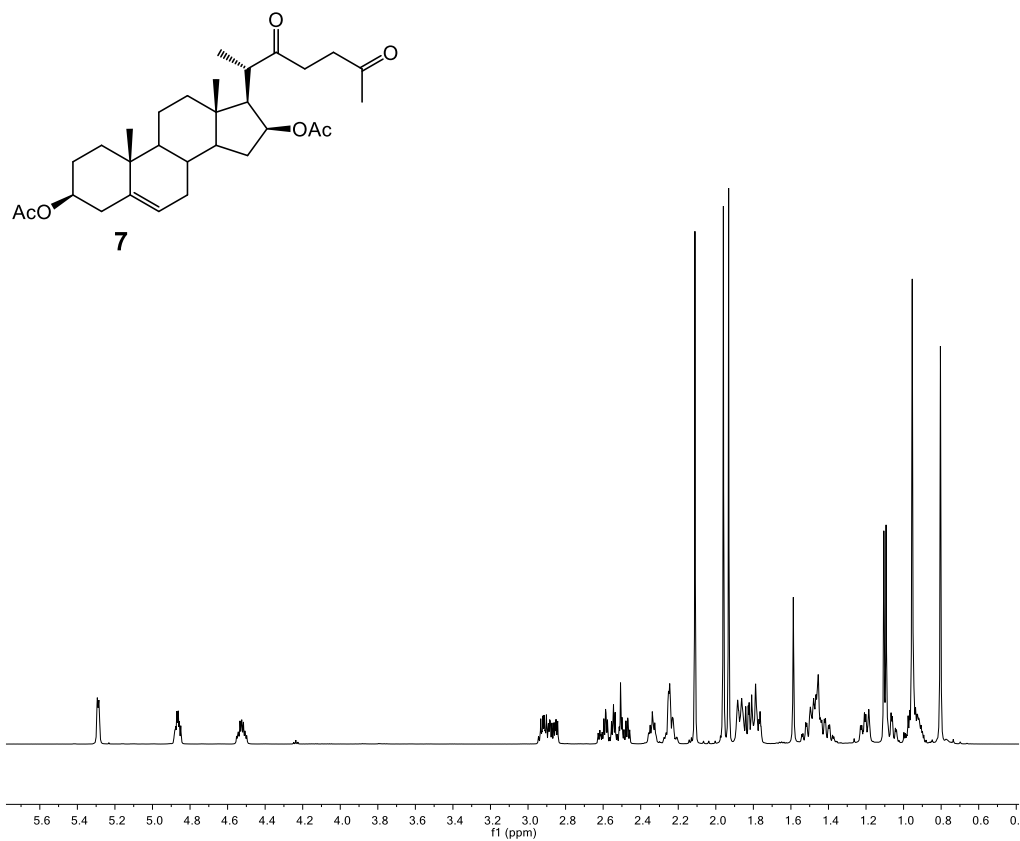

**Figure S16.**  $^1\text{H}$  NMR  $\text{CDCl}_3$ , 600 MHz compound **7**.

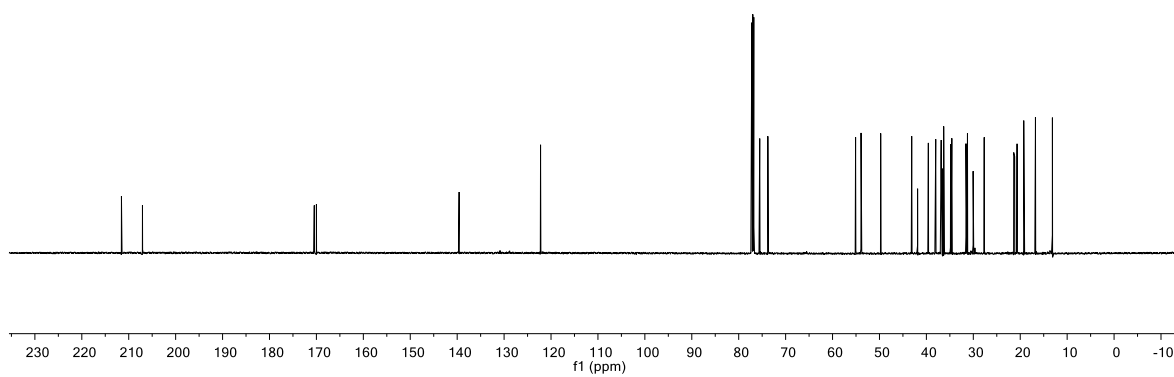

**Figure S17.**  $^{13}\text{C}$  NMR  $\text{CDCl}_3$ , 150 MHz compound **7**.

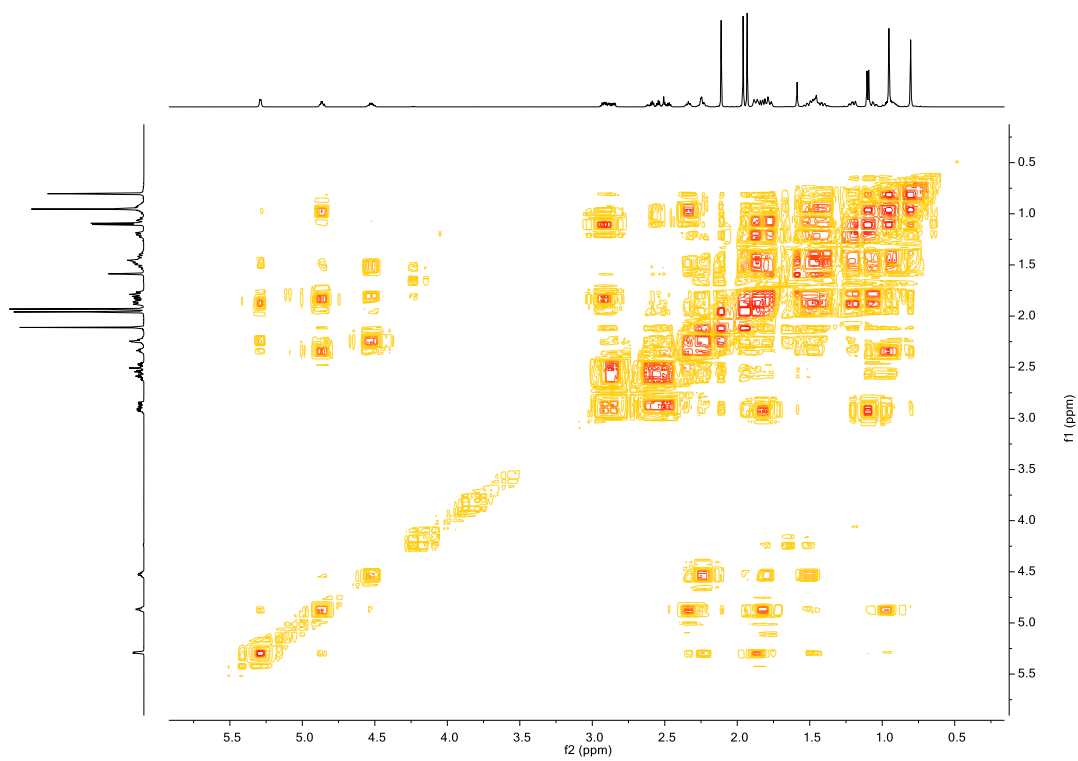

**Figure S18.** COSY experiment compound **7**.

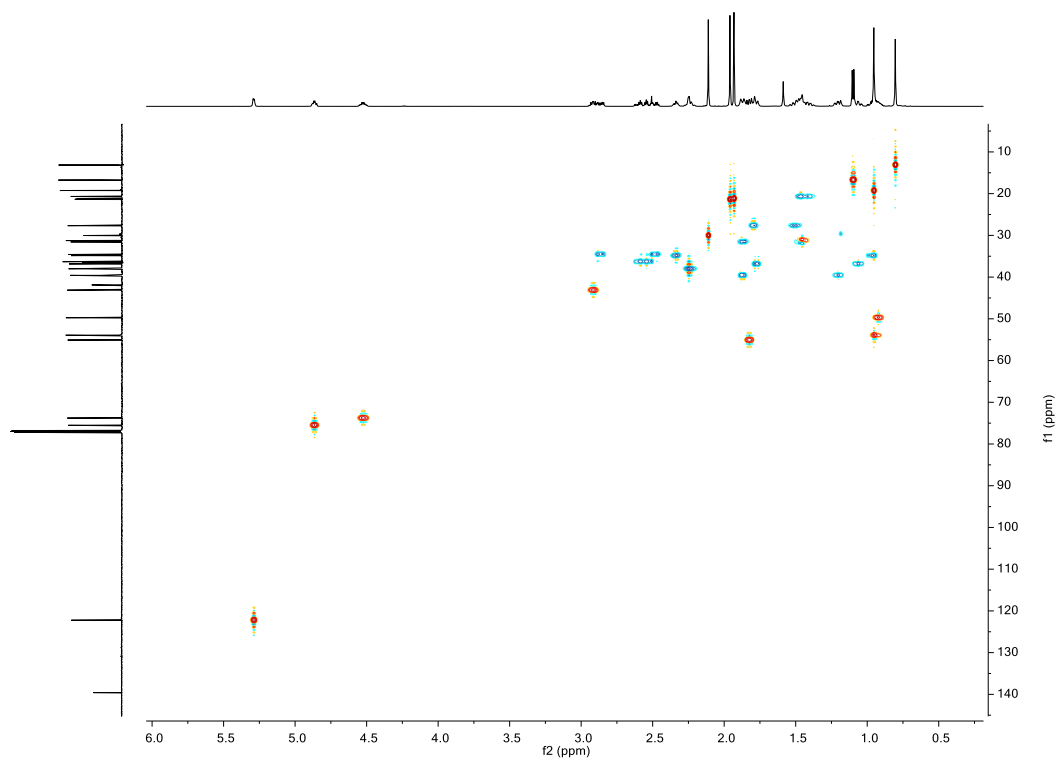

**Figure S19.** HSQC experiment compound **7**.

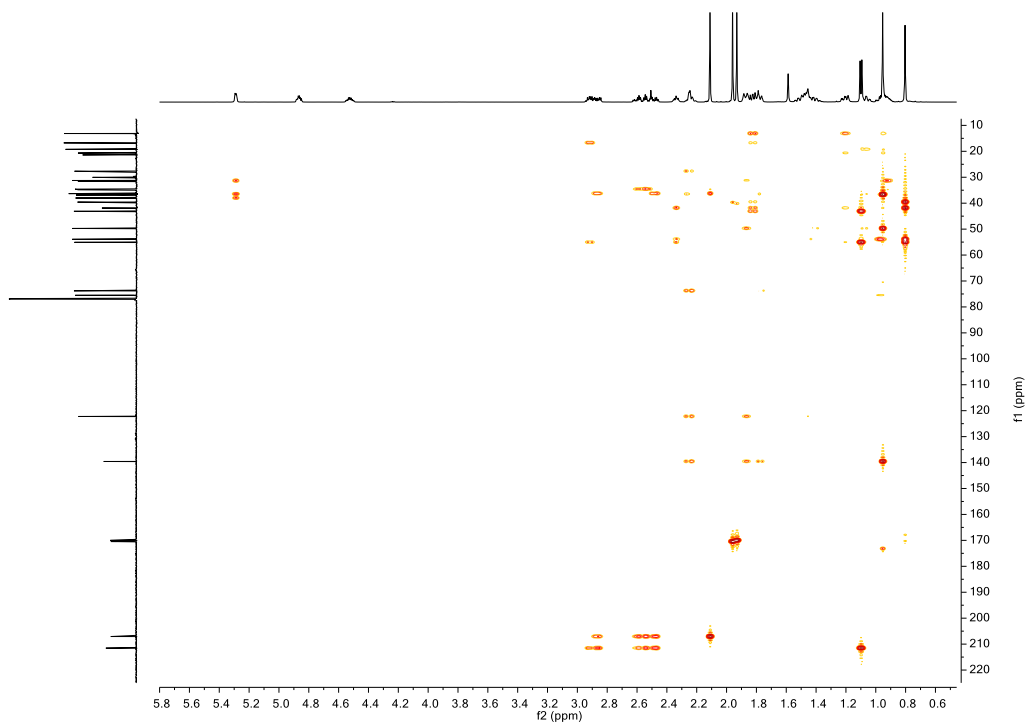

**Figure S20.** HMBC experiment compound **7**.

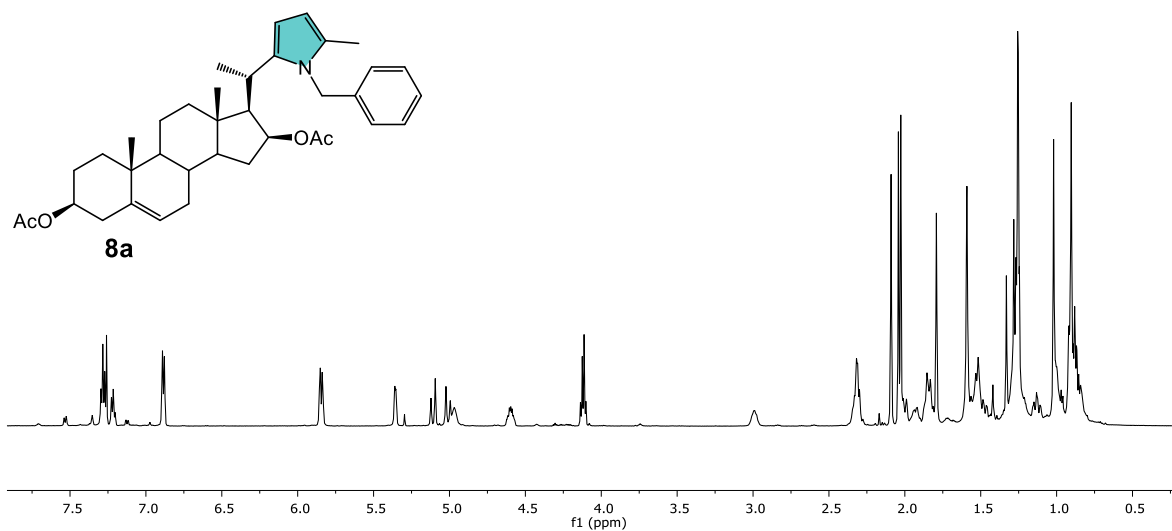

**Figure S21.**  $^1\text{H}$  NMR  $\text{CDCl}_3$ , 600 MHz compound **8a**.

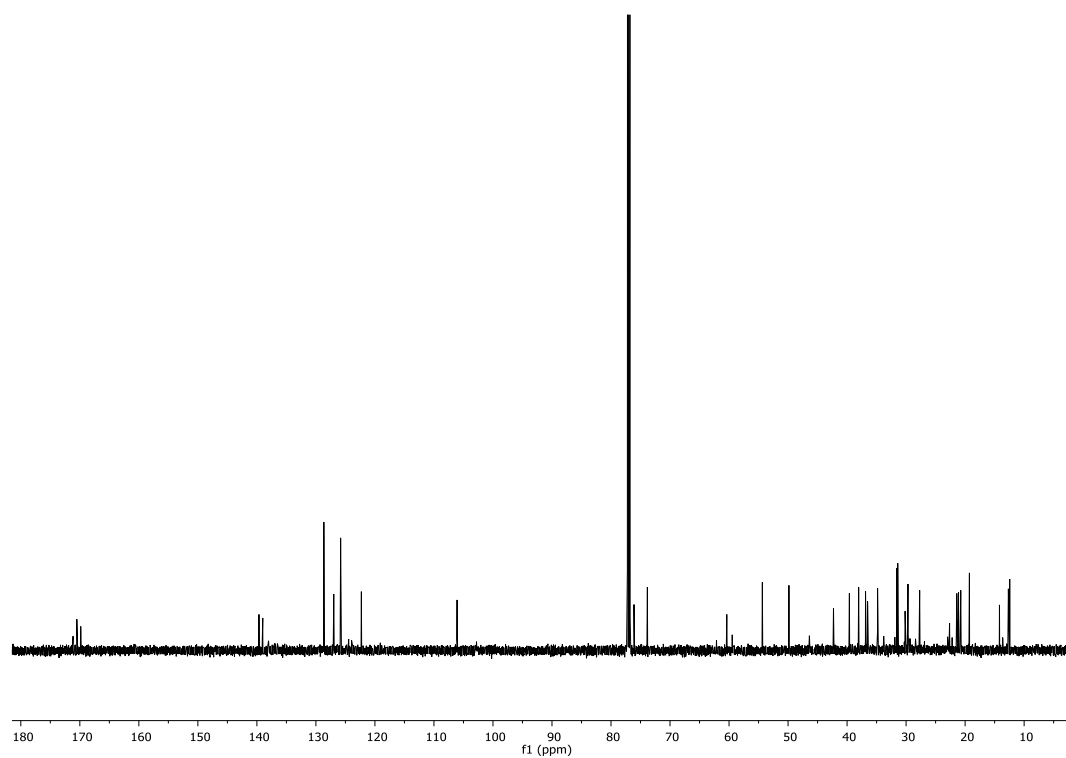

**Figure S22.**  $^{13}\text{C}$  NMR  $\text{CDCl}_3$ , 150 MHz compound **8a**.

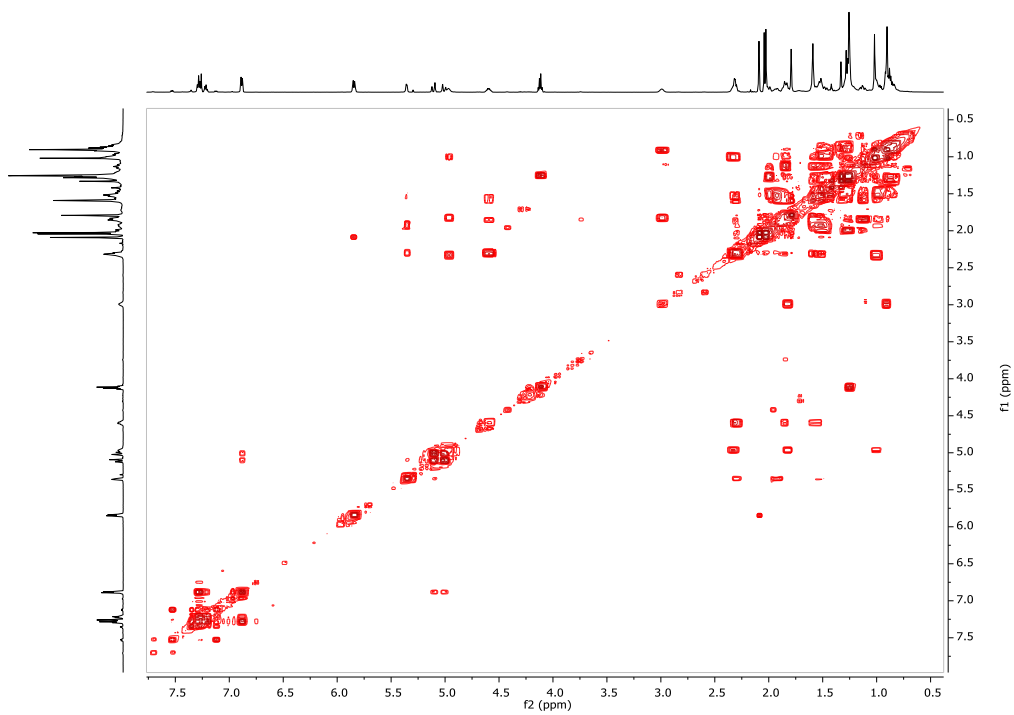

**Figure S23.** COSY experiment compound **8a**.

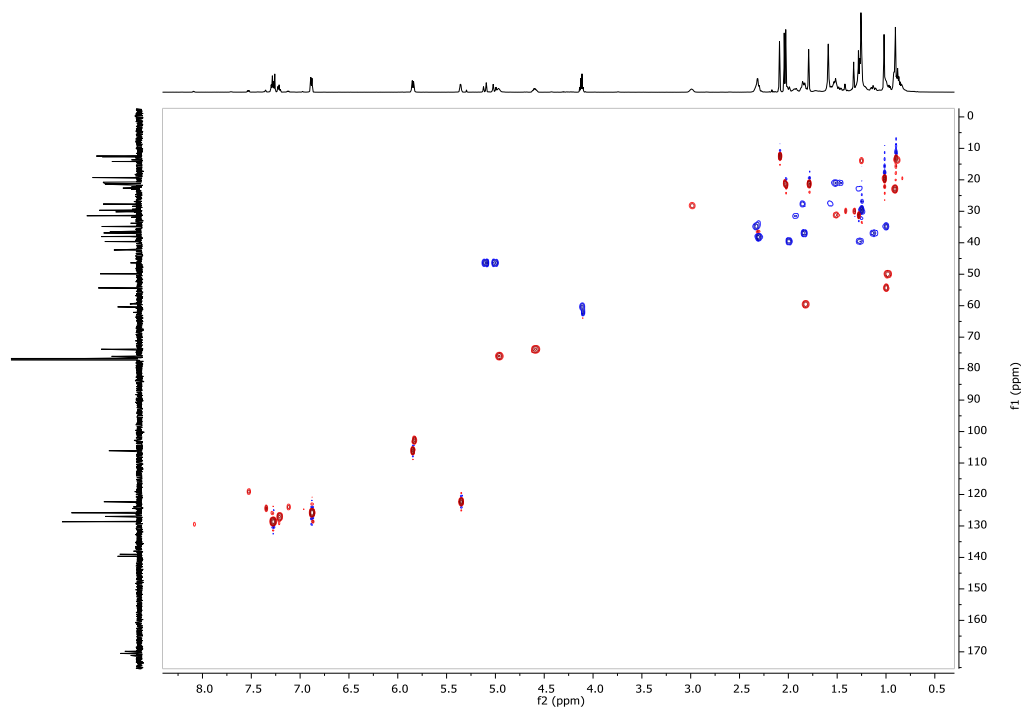

**Figure S24.** HSQC experiment compound **8a**.

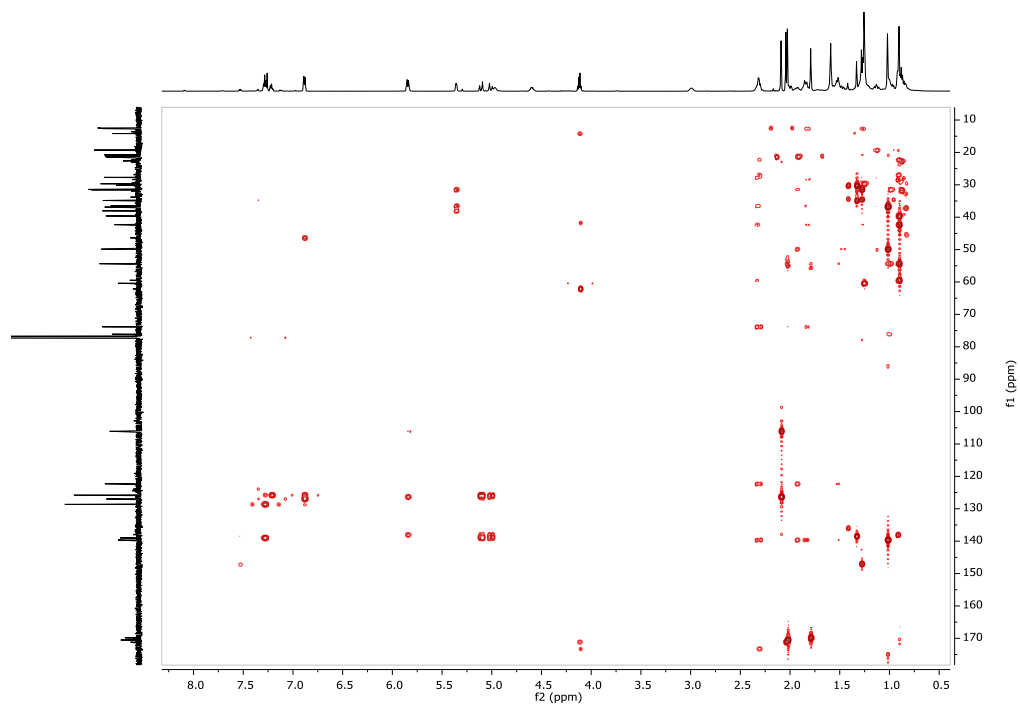

**Figure S25.** HMBC experiment compound **8a**.

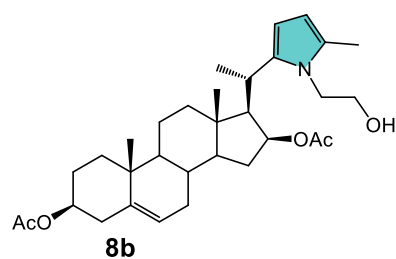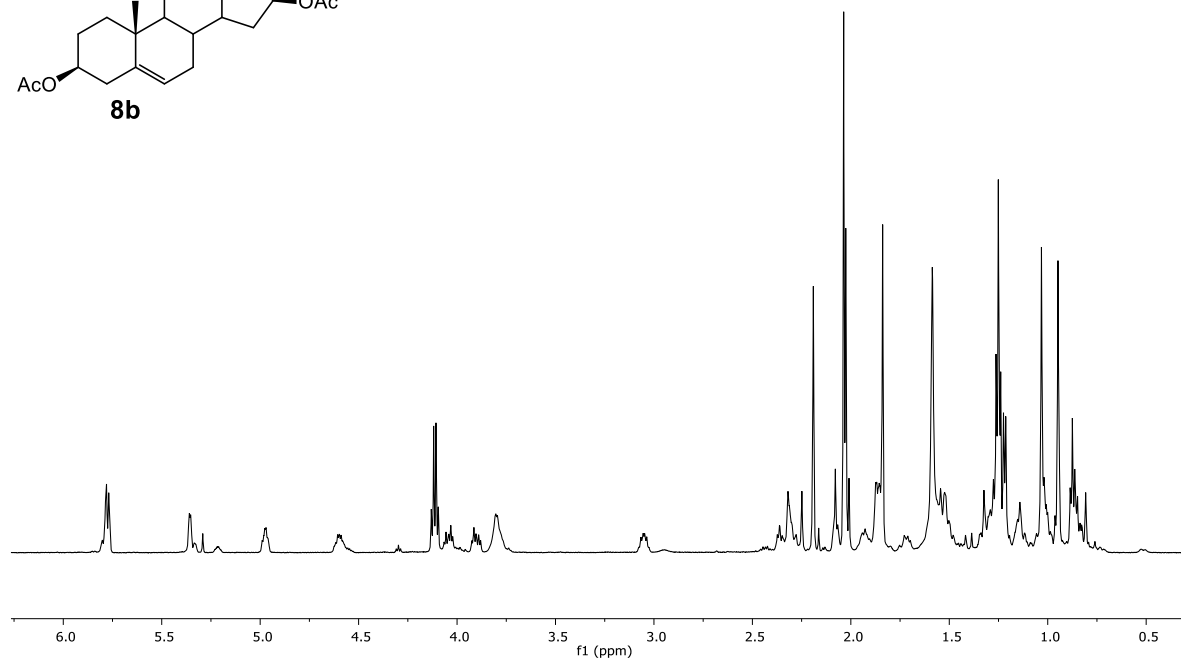

**Figure S26.**  $^1\text{H}$  NMR  $\text{CDCl}_3$ , 600 MHz compound **8b**.

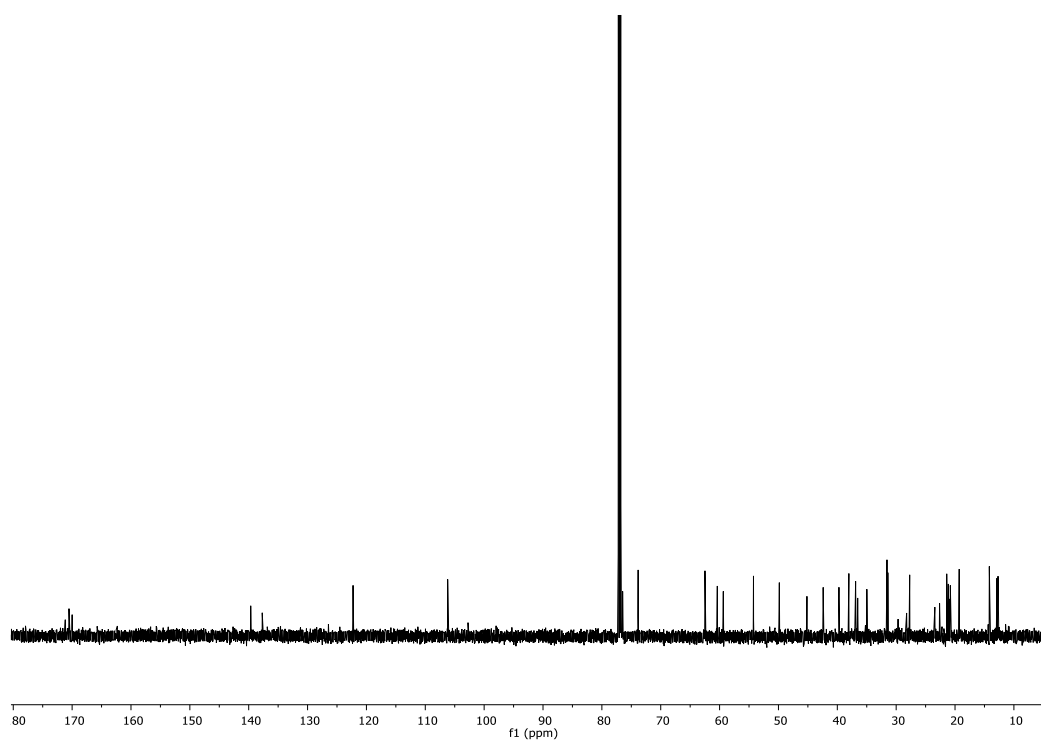

**Figure S27.**  $^{13}\text{C}$  NMR  $\text{CDCl}_3$ , 150 MHz compound **8b**.

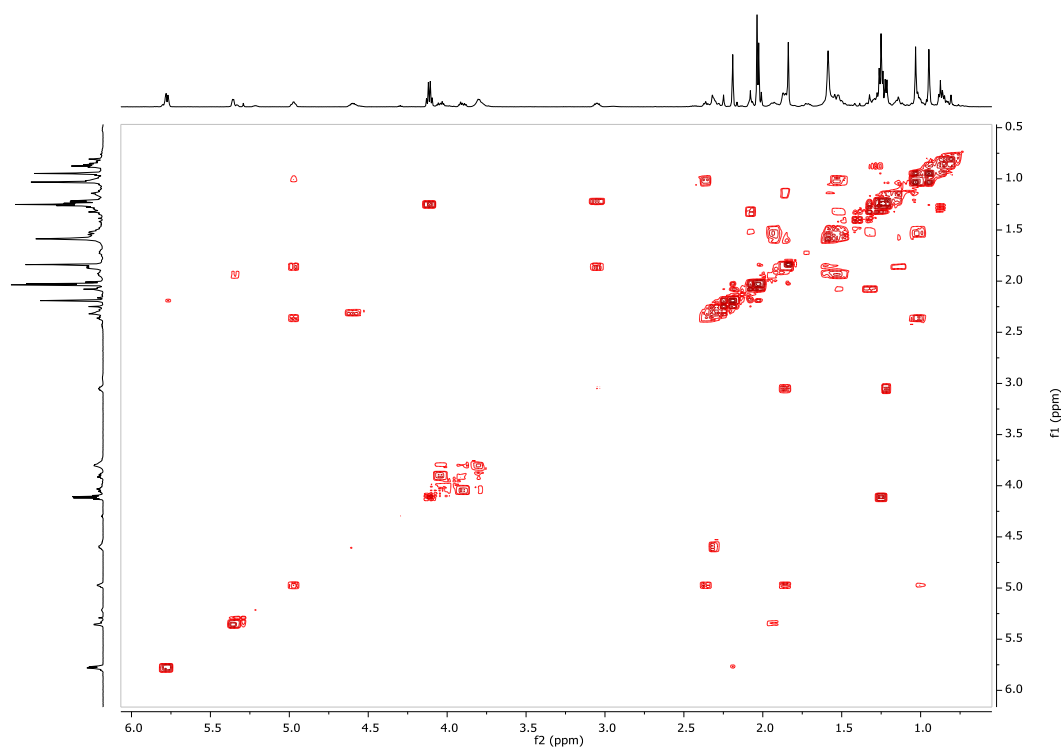

**Figure S28.** COSY experiment compound **8b**.

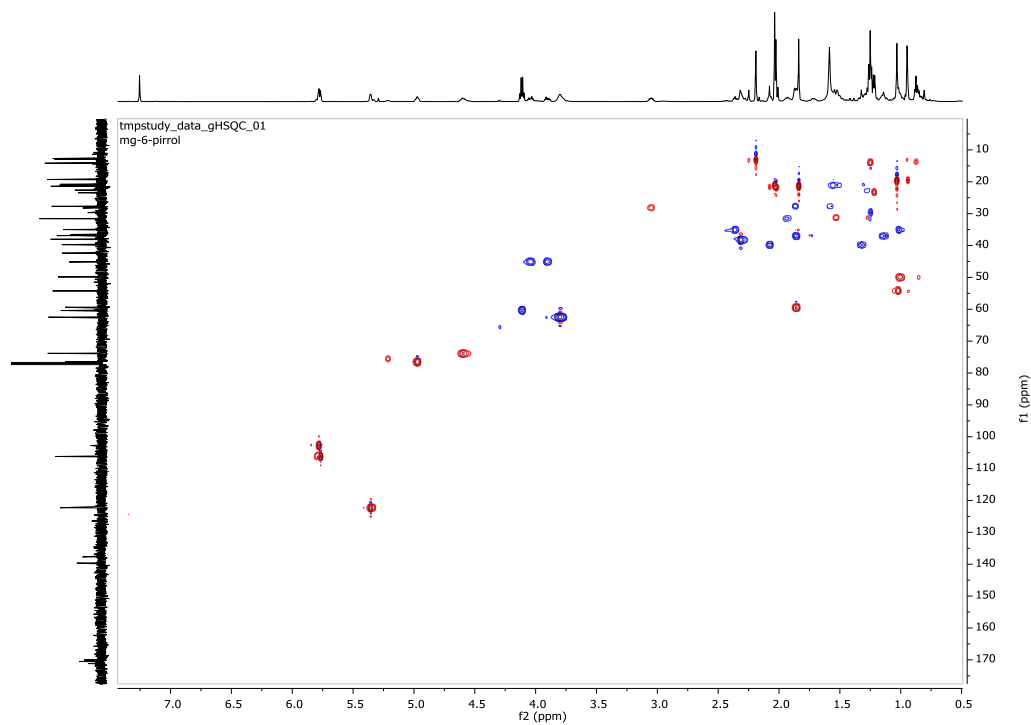

**Figure S29.** HSQC experiment compound **8b**.

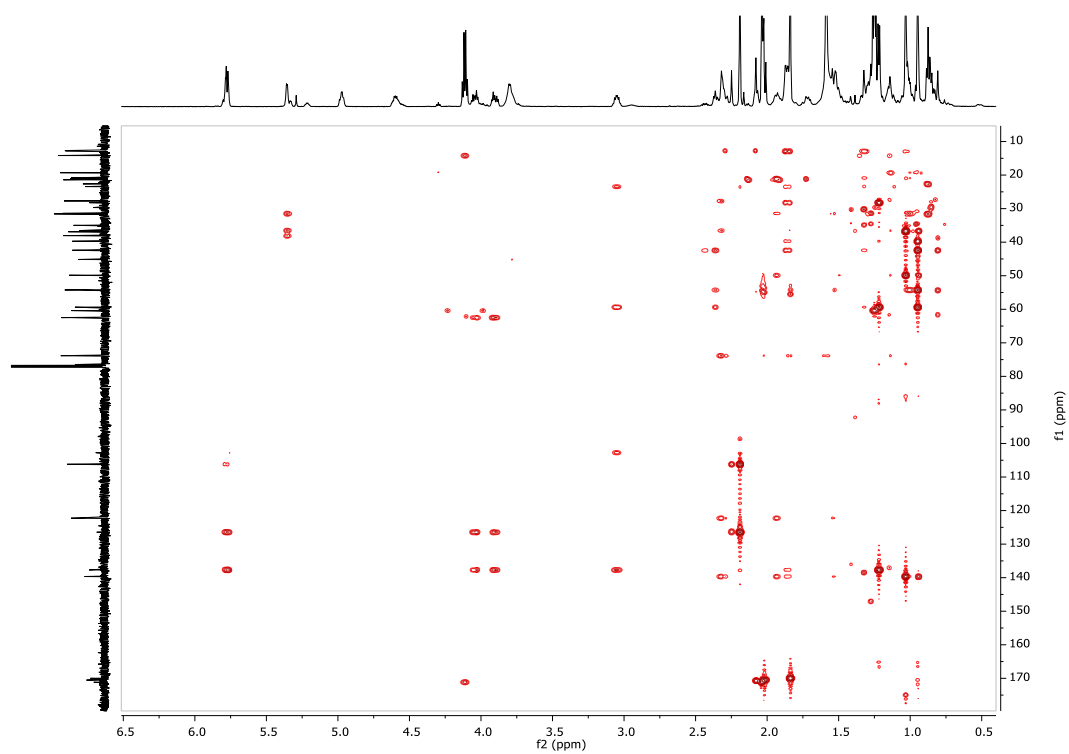

**Figure S30.** HMBC experiment compound **8b**.



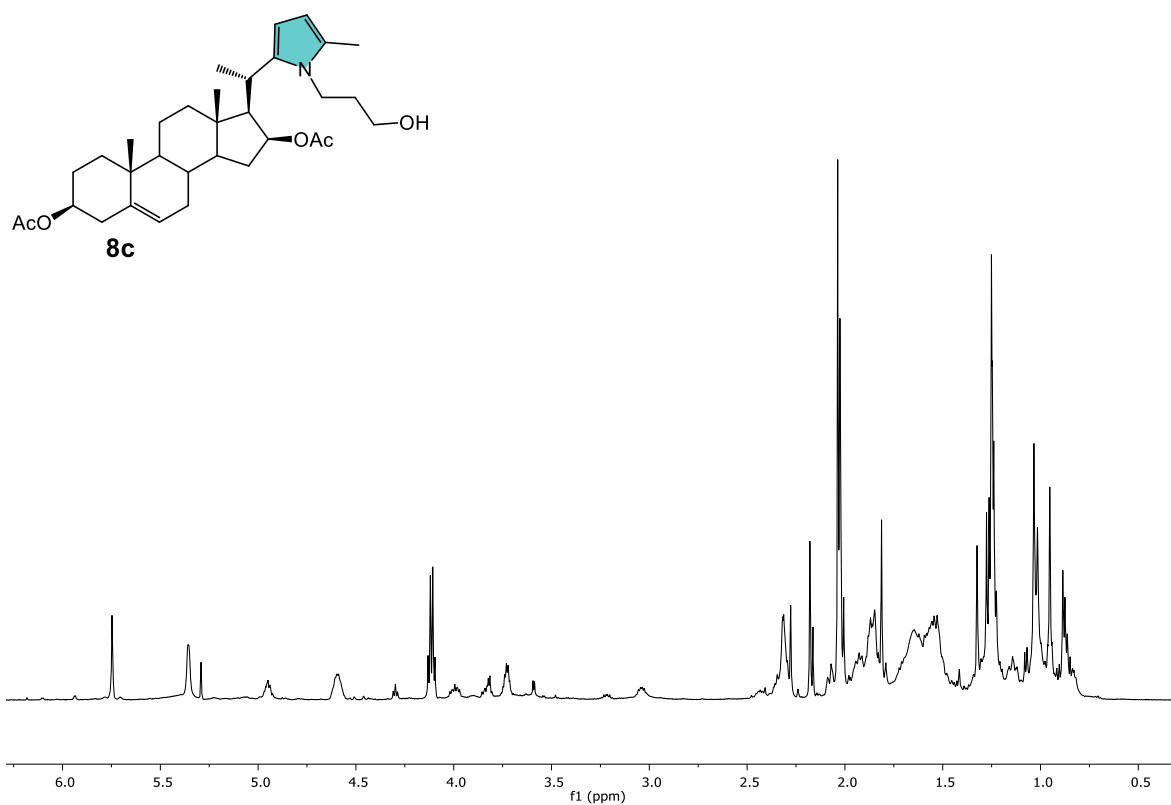

**Figure S31.**  $^1\text{H}$  NMR  $\text{CDCl}_3$ , 600 MHz compound **8c**.

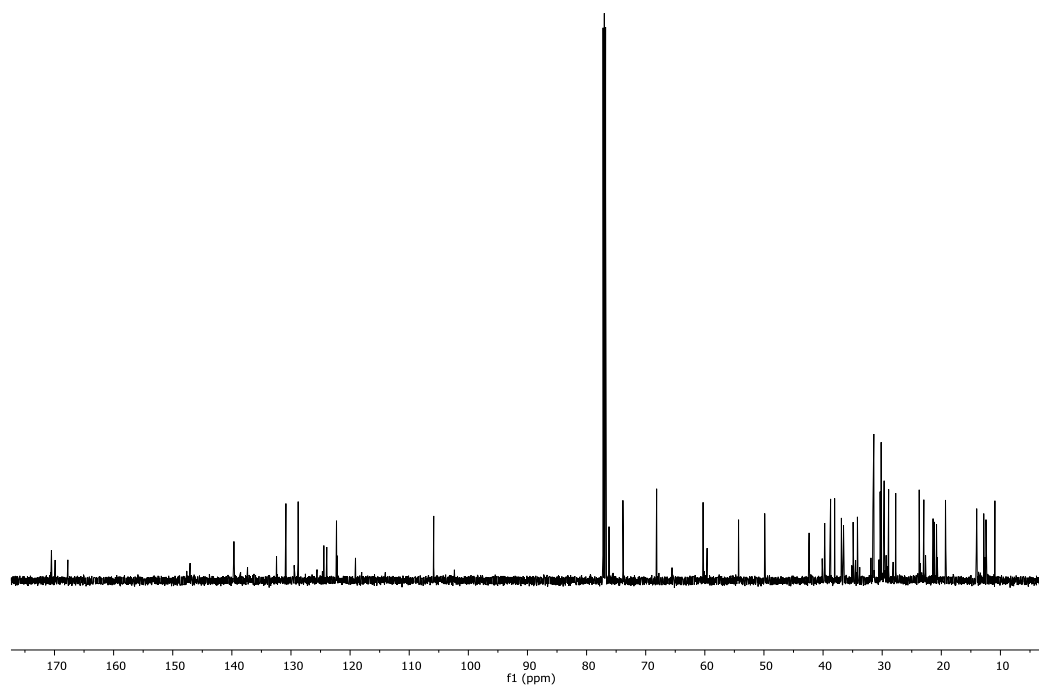

**Figure S32.**  $^{13}\text{C}$  NMR  $\text{CDCl}_3$ , 150 MHz compound **8c**.

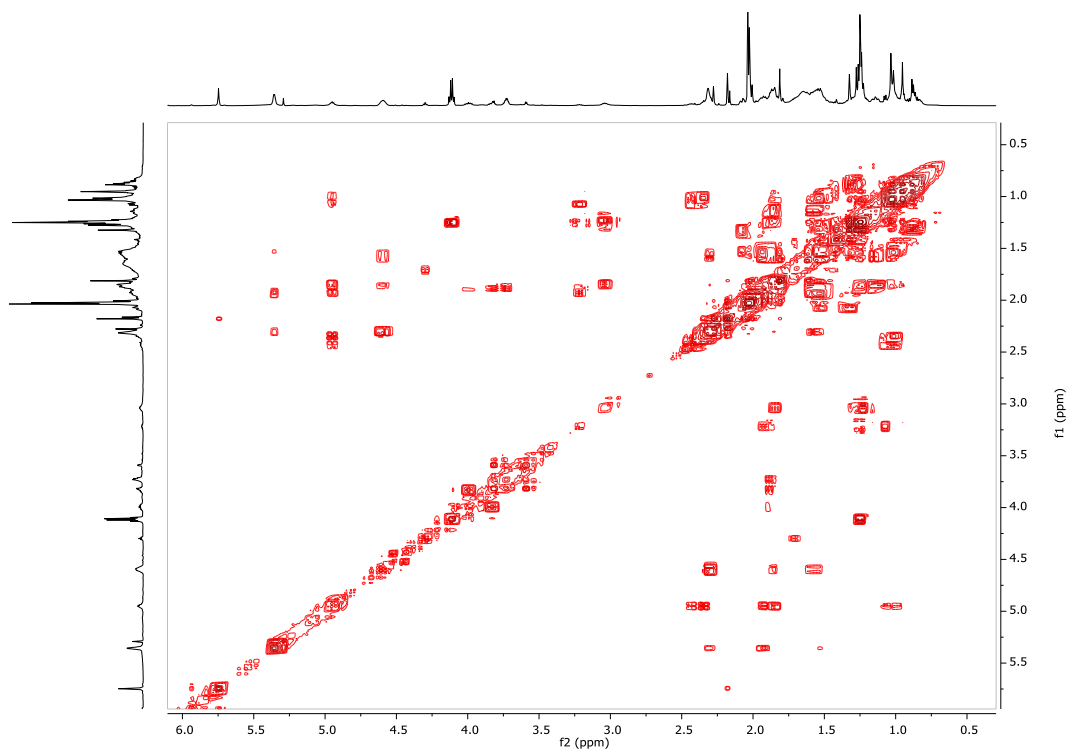

**Figure S33.** COSY experiment compound **8c**.

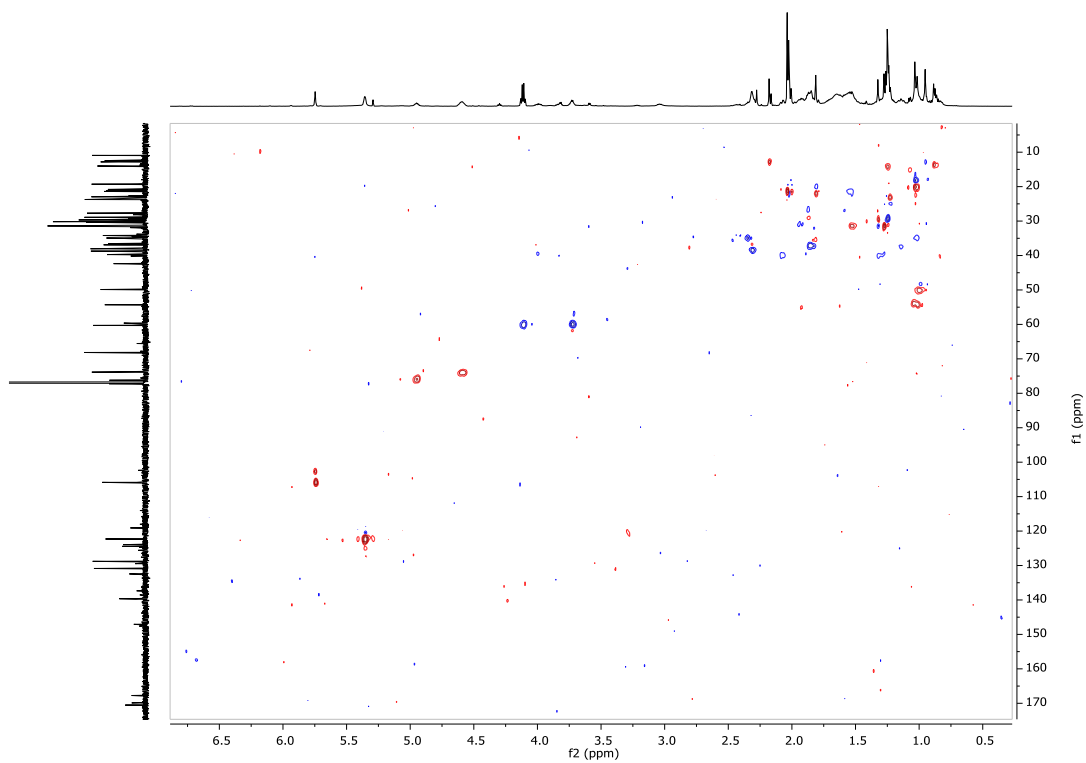

**Figure S34.** HSQC experiment compound **8c**.

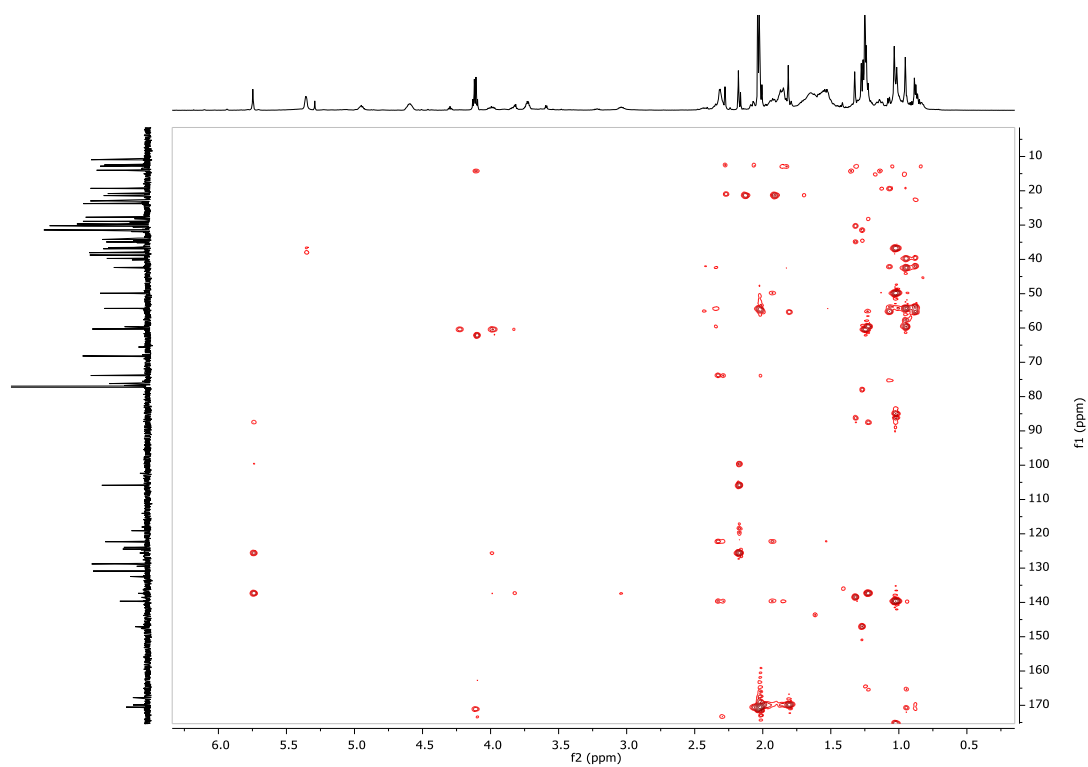

**Figure S35.** HMBC experiment compound **8c**.
